# Supplementary material for: Synthesis, Structure, Crystallization and Mechanical Properties of Isodimorphic PBS-ran-PCL Copolyesters
Source: MDPI journal article supplement (doi:10.3390/polym13142263), 2021-07-09
Supplement: s1 [file s1]

## *Supplementary Materials*

# **Synthesis, Structure, Crystallization and Mechanical Properties of Isodimorphic PBS-*ran*-PCL Copolyesters**

Maryam Safari <sup>1</sup>, Itziar Otaegi <sup>1</sup>, Nora Aramburu <sup>1</sup>, Guerrica-echevarria<sup>1</sup>, Antxon Martínez de Ilarduya <sup>2</sup>, Haritz Sardon <sup>1</sup>, Alejandro J. Müller <sup>1,3 \*</sup>

<sup>1</sup> POLYMAT and Department of Polymers and Advanced Materials: Physics, Chemistry and Technology, Faculty of Chemistry, University of the Basque Country UPV/EHU, Paseo Manuel de Lardizabal, 3, 20018 Donostia-San Sebastián, Spain. maryam.safari@polymat.eu, itziar.otaegi@ehu.eus, nora.aramburu@ehu.eus, gonzalo.gerrika@ehu.eus, haritz.sardon@ehu.eus.

<sup>2</sup> Departament d'Enginyeria Química, Universitat Politècnica de Catalunya, ETSEIB, Diagonal 647, 08028 Barcelona, Spain. antxon.martinez.de.ilarduia@upc.edu.

<sup>3</sup> IKERBASQUE, Basque Foundation for Science, Plaza Euskadi 5, 48009 Bilbao, Spain. alejandrojesus.muller@ehu.es

\* Corresponding author: email: alejandrojesus.muller@ehu.es. Tel.: +34 943018191.

Table S1. Synthesis results of the copolymerization of butylene succinate and  $\epsilon$ -caprolactone.

| Polyester                             | Composition <sup>a</sup> |       | Molecular weight <sup>b</sup> |       |           | Microstructure <sup>c</sup> |           |       |      |
|---------------------------------------|--------------------------|-------|-------------------------------|-------|-----------|-----------------------------|-----------|-------|------|
|                                       | (BS/CL mol/mol)          |       | (g/mol)                       |       |           | (S-centered triads content) |           |       |      |
|                                       | Feed                     | Found | $M_n$                         | $M_w$ | $\bar{D}$ | BSB                         | BSCL/CLSB | CLSCL | $R$  |
| HMw-PBS                               | 100/0                    | 100/0 | 32700                         | 70300 | 2.2       | -                           | -         | -     | -    |
| HMw-BS <sub>78</sub> CL <sub>22</sub> | 80/20                    | 78/22 | 19750                         | 51400 | 2.6       | 62                          | 26        | 12    | 1.03 |
| HMw-BS <sub>68</sub> CL <sub>34</sub> | 70/30                    | 68/32 | 34000                         | 91300 | 2.7       | 55                          | 28        | 17    | 1.00 |
| HMw-BS <sub>60</sub> CL <sub>40</sub> | 60/40                    | 60/40 | 18400                         | 35500 | 1.9       | 44                          | 34        | 22    | 1.10 |
| HMw-BS <sub>55</sub> CL <sub>45</sub> | 55/45                    | 55/45 | 17300                         | 39850 | 2.3       | 48                          | 18        | 34    | 0.98 |
| HMw-BS <sub>51</sub> CL <sub>49</sub> | 50/50                    | 51/49 | 23200                         | 87850 | 3.8       | 44                          | 14        | 42    | 1.00 |
| HMw-BS <sub>46</sub> CL <sub>54</sub> | 45/55                    | 46/54 | 26000                         | 60700 | 2.3       | 40                          | 13        | 47    | 1.02 |
| HMw-BS <sub>38</sub> CL <sub>62</sub> | 40/60                    | 38/62 | 17800                         | 39500 | 2.2       | 29                          | 16        | 55    | 1.01 |
| HMw-BS <sub>15</sub> CL <sub>85</sub> | 15/90                    | 15/85 | 26350                         | 53100 | 2.0       | 8                           | 14        | 78    | 1.00 |
| HMw-PCL                               | 0/100                    | 0/100 | 31000                         | 60000 | 1.9       | -                           | -         | -     | -    |

<sup>a</sup> Composition of the feed and the resulting polymer as determined by <sup>1</sup>H NMR.

<sup>b</sup> Number and weight average molecular weights and dispersities estimated by GPC against PMMA standards.

<sup>c</sup> Copolyester microstructure determined by NMR;  $R$  is the degree of randomness which should be 1 for a fully statistical distribution of the comonomeric units.

\*Polycondensation were performed under vacuum at 220 °C for around 5h.

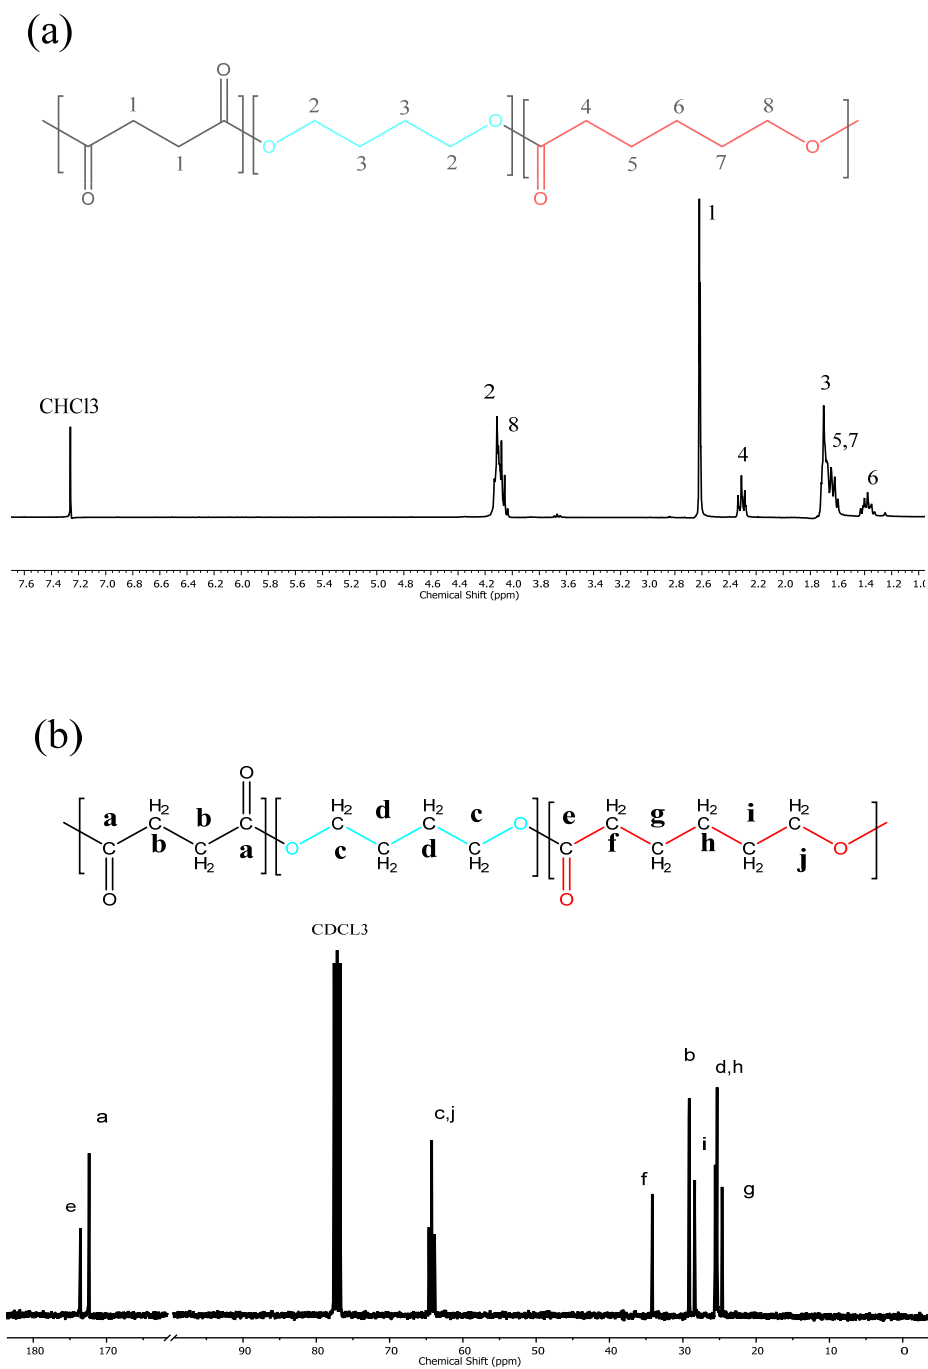

**Figure S1.**  $^1\text{H}$  (a) and  $^{13}\text{C}$  (b) NMR spectra of HMw-BS<sub>51</sub>CL<sub>49</sub> as representative of the HMw-BS<sub>x</sub>CL<sub>y</sub> copolyesters series recorded in CDCl<sub>3</sub>. Peaks were assigned according to the expected copolyester constitution depicted in the attached formula.

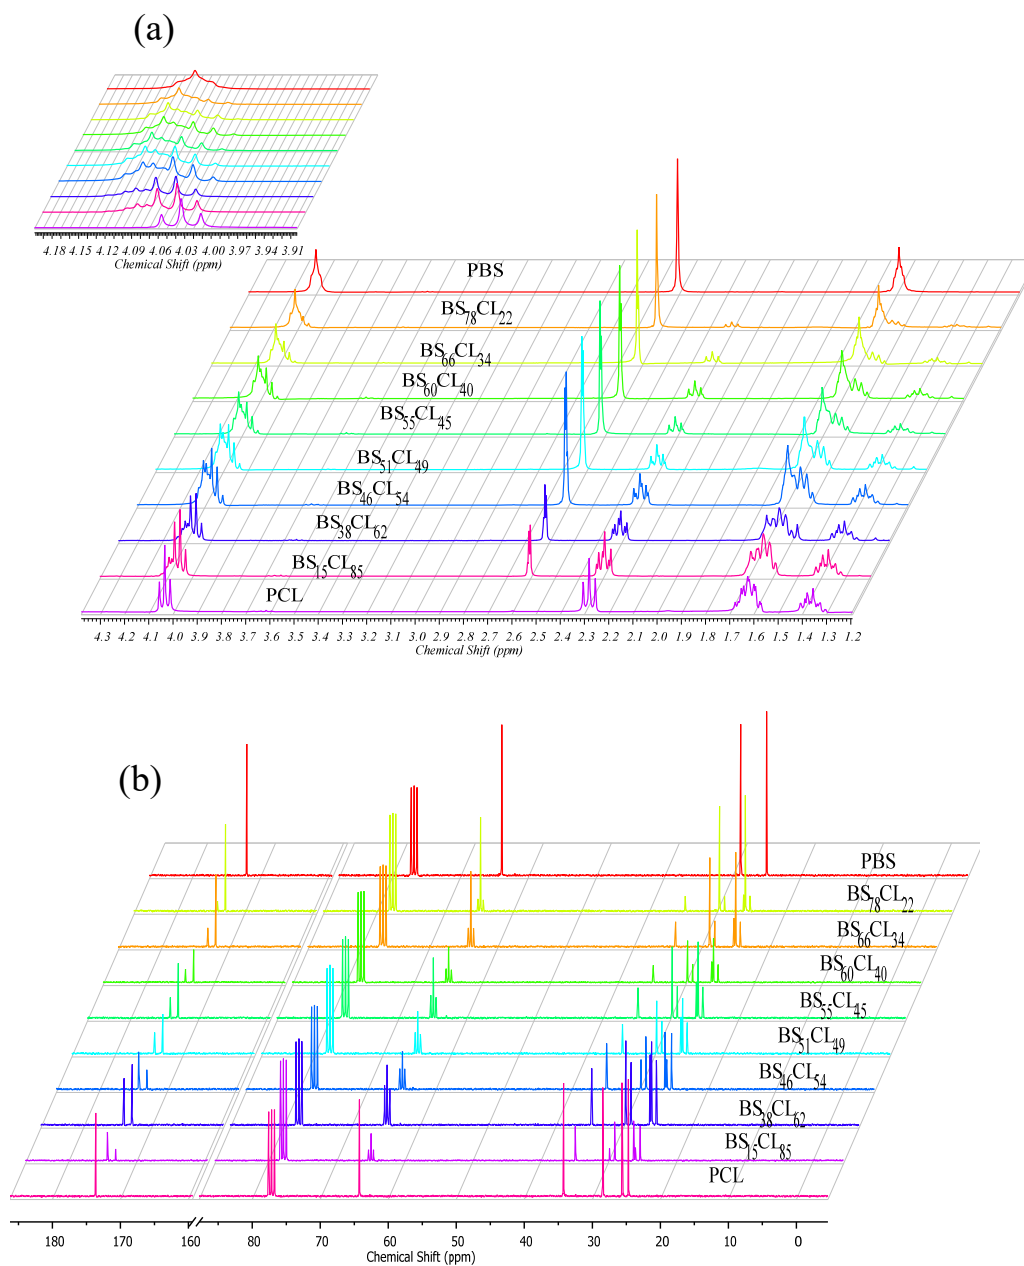

**Figure S2.**  $^1\text{H}$  (a) and  $^{13}\text{C}$  (b) NMR spectra comparison of all HMw-BS $_x$ CL $_y$  copolyesters series.

**Table S2.** Thermal characterization data of HMw-BS<sub>x</sub>CL<sub>y</sub> copolymer obtained from DSC.

| Copolymer                             | $T_m$ (°C) | $\Delta H_m$ (J/g) | $T_c$ (°C) | $\Delta H_c$ (J/g) | $X_c$ (%) |
|---------------------------------------|------------|--------------------|------------|--------------------|-----------|
| HMw-PBS                               | 114.6      | 66                 | 69.2       | 59                 | 54        |
| HMw-BS <sub>78</sub> CL <sub>22</sub> | 94.1       | 46                 | 43.0       | 41                 | 30        |
| HMw-BS <sub>68</sub> CL <sub>32</sub> | 78.3       | 40                 | 13.8       | 8                  | 5         |
| HMw-BS <sub>60</sub> CL <sub>40</sub> | 69.2       | 38                 | 10.8       | 8                  | 4.5       |
| HMw-BS <sub>55</sub> CL <sub>45</sub> | 67.0       | 35                 | 10.1       | 8                  | 4         |
| HMw-BS <sub>51</sub> CL <sub>49</sub> | 53.8       | 30                 | -9.5       | 1.8                | 1         |
| HMw-BS <sub>46</sub> CL <sub>54</sub> | 40 & 15    | 17 & 24            | -25.0      | 0.9                | 0.5       |
| HMw-BS <sub>38</sub> CL <sub>62</sub> | 23.6       | 32                 | -3.8       | 35                 | 15        |
| HMw-BS <sub>15</sub> CL <sub>85</sub> | 31.2       | 42                 | 3.2        | 39                 | 23        |
| HMw-PCL                               | 56.8       | 55                 | 33         | 55                 | 38        |

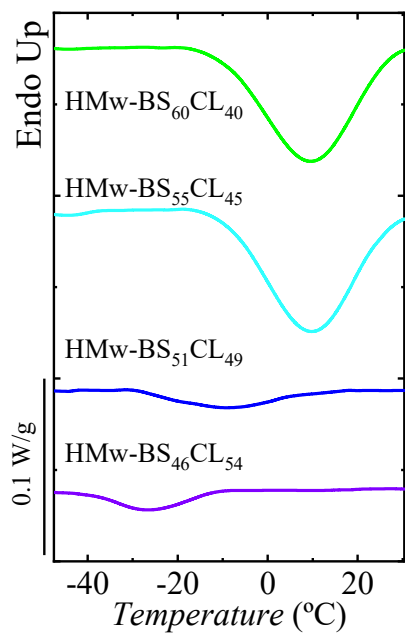

**Figure S3.** Cooling DSC scans from the melt for those compositions that show a broad crystallization peak.

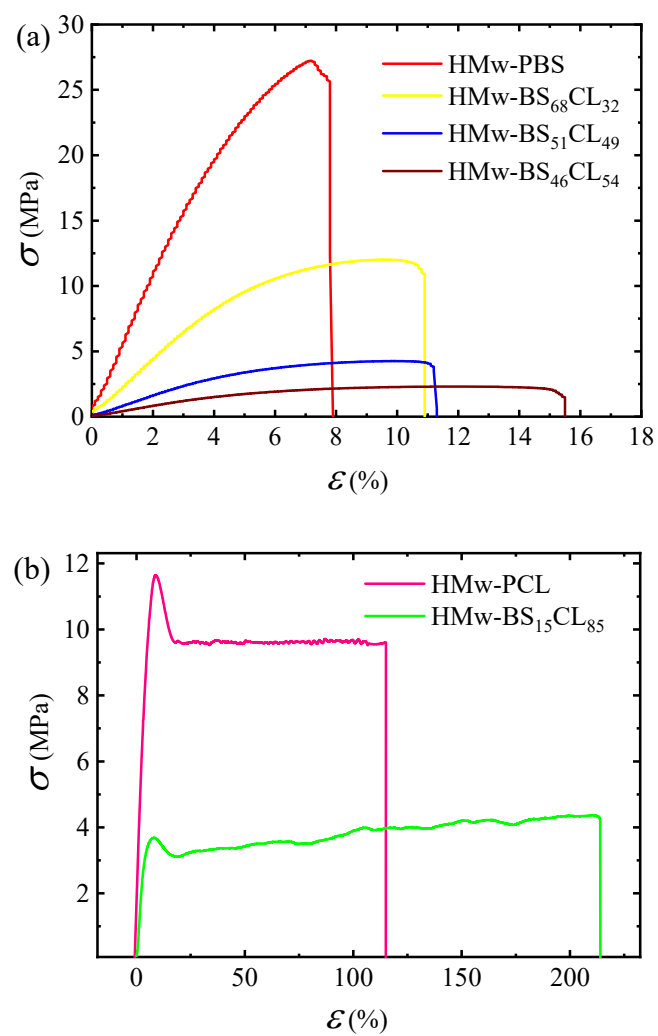

**Figure S4.** Representative stress-strain curves of (a) BS-rich HMw-BS<sub>x</sub>CL<sub>y</sub> and (b) CL-rich HMw-BS<sub>x</sub>CL<sub>y</sub> random copolyesters.

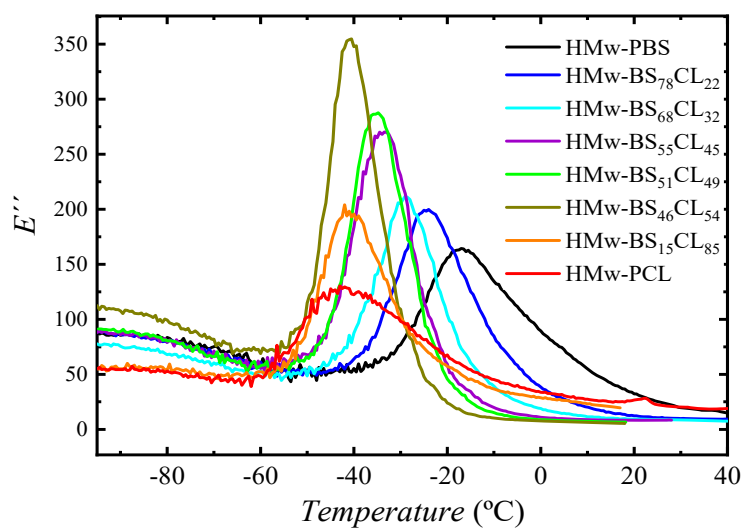

**Figure S5.** Loss modulus as a function of temperature at a constant heating rate of 4  $^{\circ}\text{C}/\text{min}$  and frequency of 1 Hz for HMw-BS $_x$ CL $_y$  copolyesters.



**Table S3.** Nucleation and growth constants obtained from isothermal crystallization kinetics of PBS homopolymer and PBS-rich phase compositions obtained by PLOM measurement.

| Copolyester                       | $K_g^G$ (K <sup>2</sup> ) | $\sigma$ (erg/cm <sup>2</sup> ) | $\sigma_e$ (erg/cm <sup>2</sup> ) | $q$ (erg) | $R^2$ |
|-----------------------------------|---------------------------|---------------------------------|-----------------------------------|-----------|-------|
| PBS                               | 8.66E+04                  | 12.36                           | 79.52                             | 3.37E-13  | 0.983 |
| BS <sub>91</sub> CL <sub>9</sub>  | 5.80E+04                  | 12.36                           | 55.01                             | 2.33E-13  | 0.994 |
| BS <sub>78</sub> CL <sub>22</sub> | 5.12E+04                  | 12.36                           | 49.55                             | 2.10E-13  | 0.973 |
| BS <sub>66</sub> CL <sub>34</sub> | 8.94E+04                  | 12.36                           | 88.90                             | 3.78E-13  | 0.982 |
| BS <sub>62</sub> CL <sub>38</sub> | 8.92E+04                  | 12.36                           | 89.42                             | 3.87E-13  | 0.982 |
| BS <sub>55</sub> CL <sub>45</sub> | 14.4E+04                  | 12.36                           | 148.8                             | 6.30E-13  | 0.999 |
| BS <sub>51</sub> CL <sub>49</sub> | 14.5E+04                  | 12.36                           | 148.9                             | 6.32E-13  | 0.999 |
| BS <sub>45</sub> CL <sub>55</sub> | 15.7E+04                  | 12.36                           | 165.5                             | 7.02E-13  | 0.974 |
| BS <sub>11</sub> CL <sub>89</sub> | 14.7E+04                  | 6.83                            | 169.58                            | 6.32E-13  | 0.999 |
| PCL                               | 10.4E+04                  | 6.83                            | 111.97                            | 4.17E-13  | 0.996 |

$R^2$  is the correlation coefficient for the Lauritzen–Hoffman, linear plots,  $\ln(1/\tau_{50\%}) + U^*/R(T_c - T\alpha)$  vs.  $1/f \cdot T_c \cdot \Delta T$ .

**Table S4.** Parameters obtained from fitting the DSC data presented in Figure 7 (a-b) to the Lauritzen–Hoffman model.

| Copolyester                                   | $K_g^t$ (K <sup>2</sup> ) | $R^2$  | $\sigma$ (erg/cm <sup>2</sup> ) | $\sigma_e$ (erg/cm <sup>2</sup> ) | $q$ (erg) |
|-----------------------------------------------|---------------------------|--------|---------------------------------|-----------------------------------|-----------|
| PBS                                           | 2.04E+05                  | 0.9697 | 12.36                           | 186.88                            | 7.93E-13  |
| BS <sub>91</sub> CL <sub>9</sub>              | 1.85E+05                  | 0.9938 | 12.36                           | 173.80                            | 3.37E-13  |
| BS <sub>78</sub> CL <sub>22</sub>             | 2.44E+05                  | 0.9514 | 12.36                           | 236.34                            | 10.0E-13  |
| BS <sub>66</sub> CL <sub>34</sub>             | 2.92E+05                  | 0.9958 | 12.36                           | 290.42                            | 12.3E-13  |
| BS <sub>55</sub> CL <sub>45</sub>             | 3.76E+05                  | 0.9775 | 12.36                           | 387.34                            | 16.4E-13  |
| BS <sub>51</sub> CL <sub>49</sub>             | 3.79E+05                  | 0.9973 | 12.36                           | 388.50                            | 16.8E-13  |
| BS <sub>45</sub> CL <sub>55</sub> (BS – rich) | 4.91E+05                  | 0.9502 | 18.54                           | 518.73                            | 22.0E-13  |
| BS <sub>45</sub> CL <sub>55</sub> (CL – rich) | 12.5E+05                  | 0.9880 | 6.83                            | 1376.9                            | 51.3E-13  |
| BS <sub>38</sub> CL <sub>62</sub>             | 2.66E+05                  | 0.9917 | 6.83                            | 328.01                            | 12.6E-13  |
| BS <sub>27</sub> CL <sub>73</sub>             | 2.52E+05                  | 0.9845 | 6.83                            | 305.91                            | 11.4E-13  |
| BS <sub>11</sub> CL <sub>89</sub>             | 2.41E+05                  | 0.9945 | 6.83                            | 278.43                            | 10.4E-13  |
| PCL                                           | 2.40E+05                  | 0.9082 | 6.83                            | 260.61                            | 9.71E-13  |

$R^2$  is the correlation coefficient for the Lauritzen–Hoffman, linear plots  $\ln(1/\tau_{50\%}) + U^*/R(T_c - T_\infty)$  vs.  $1/f \cdot T_c \cdot \Delta T$ .
